# Supplementary material for: Gating of TonB-dependent transporters by substrate-specific forced remodelling
Source: PubMed Central journal article supplement (PMC5413942; doi:10.1038/ncomms14804), 2017-04-21
Supplement: ncomms14804-s1.pdf [file ncomms14804-s1.pdf]

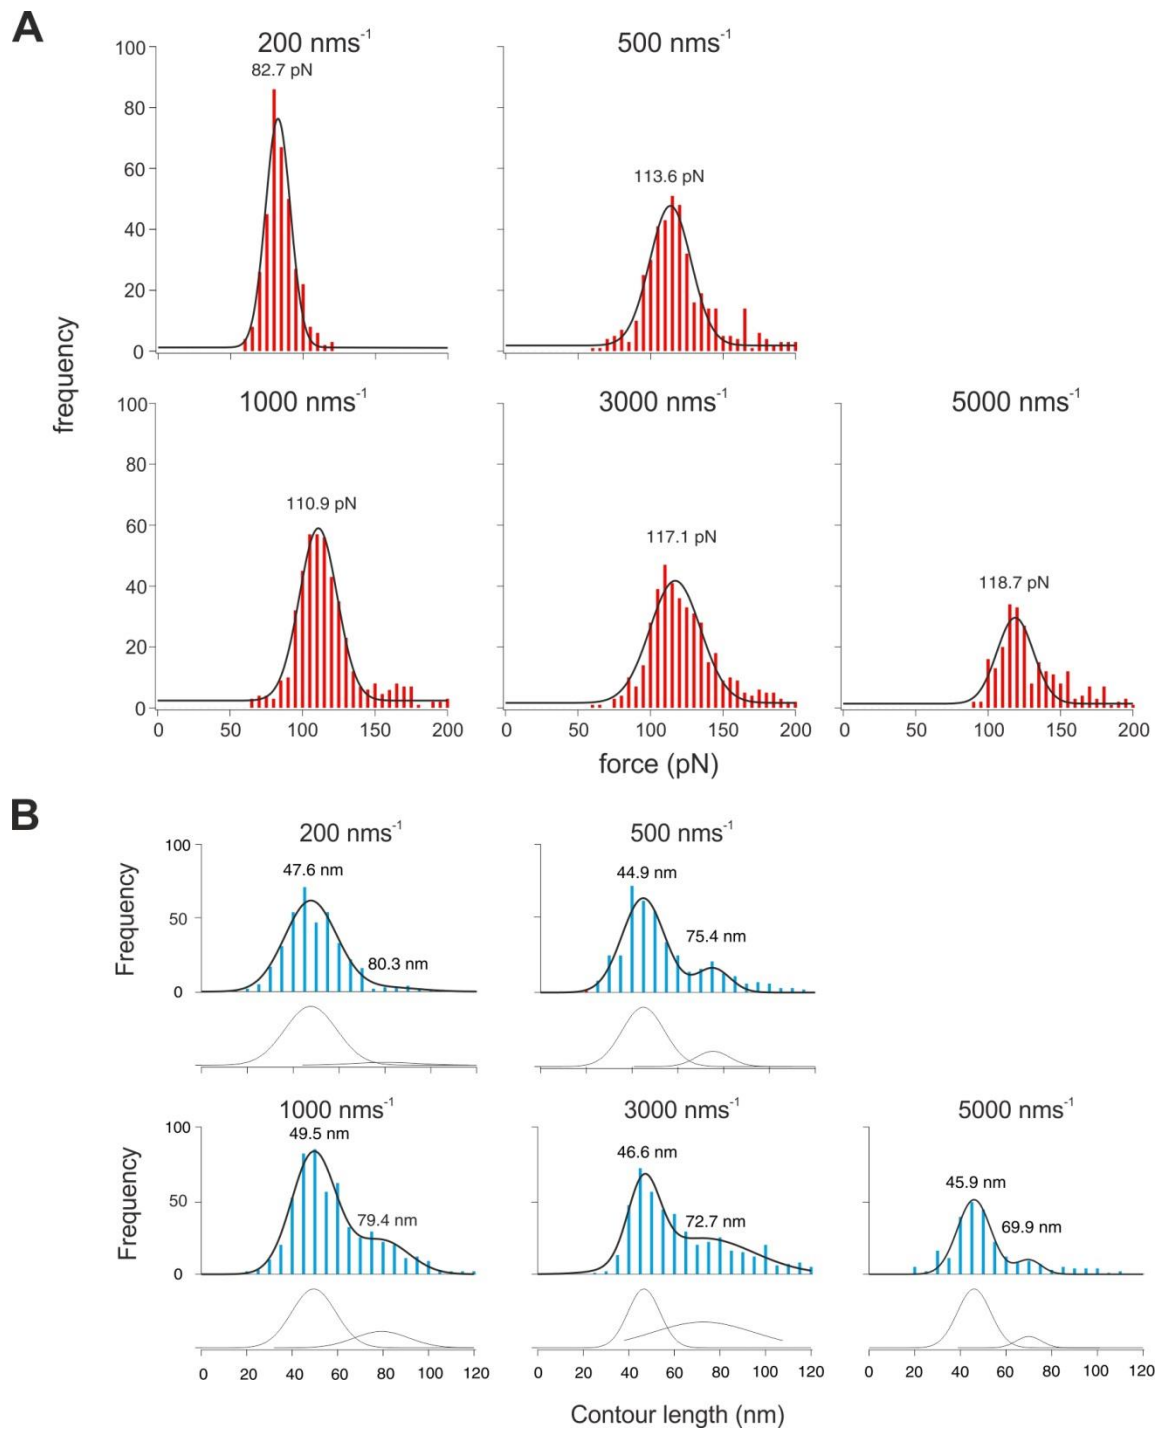

**Supplementary Fig. 1: A)** Force-frequency distributions (red bars) for  $TB_{BtuB}:TonB_{\Delta TMD}$  dissociation events with fits to a single Gaussian distribution for the five pulling velocities (200, 500, 1000, 3000, and 5000  $nms^{-1}$ ) used in this study. **B)** Contour-frequency distributions (blue bars) for  $TB_{BtuB}:TonB_{\Delta TMD}$  dissociation events fitted to multiple Gaussian distributions for the five pulling velocities (200, 500, 1000, 3000, and 5000  $nms^{-1}$ ) used in this study. The deconvoluted Gaussians are shown below. Histograms contain the full triplicate data collected.

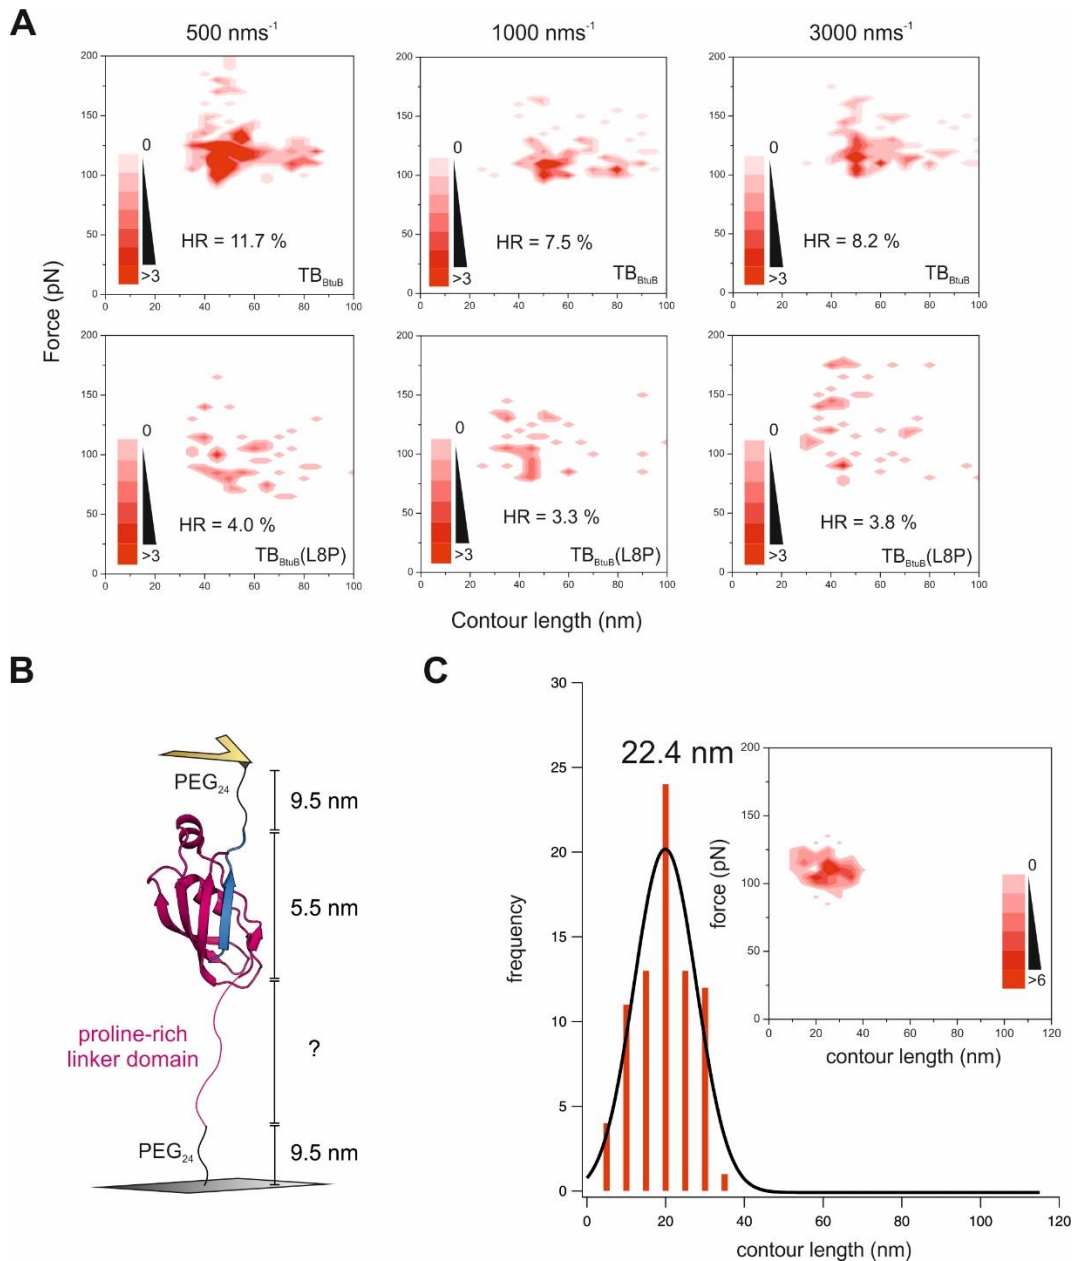

**Supplementary Fig. 2: A)** Force spectroscopy data (rupture force and contour length) of TB<sub>BtuB</sub> (top) and L8P TB<sub>BtuB</sub> (bottom) unbinding from TonB<sub>ΔTMD</sub> plot as 2D contour maps at three different retraction velocities. Each contour map contains all filtered data reflecting single-molecule dissociation events after 1200 surface-approaches over a large surface area. The ‘hot spot’ of specific unbinding events is lost in the L8P variant. The hit rate (HR) is shown in the inset of each graph. The points were binned by a contour length of 5 nm and force of 10 pN, the number of points that occupy a quadrant are indicated by the colour of the contours. **B)** Individual lengths of each component. **C)** To verify that the bimodal contour length distributions evident in Supplementary Figs. 1B and 2A were due to the presence of an extended and compact form of the linker region of TonB, a construct was created which only comprised the structured C-terminal domain of TonB (residues 145-239) (designated TonB<sub>CTD</sub>). AFM was performed using the same conditions as the TonB<sub>ΔTMD</sub> experiment and the resultant contour length-frequency distribution for TB<sub>BtuB</sub>:TonB<sub>CTD</sub> dissociation events at a pulling velocity of 500 nms<sup>-1</sup> fitted well to a single Gaussian. The inset shows a contour map of contour length vs rupture force for the same data set. Points were binned by a contour length of 5 nm and force of 10 pN and the number of points that occupy a quadrant are indicated by the colour of the contours. These data suggest that the linker region of TonB populates at least two mechanically distinct conformations (manuscript in preparation).

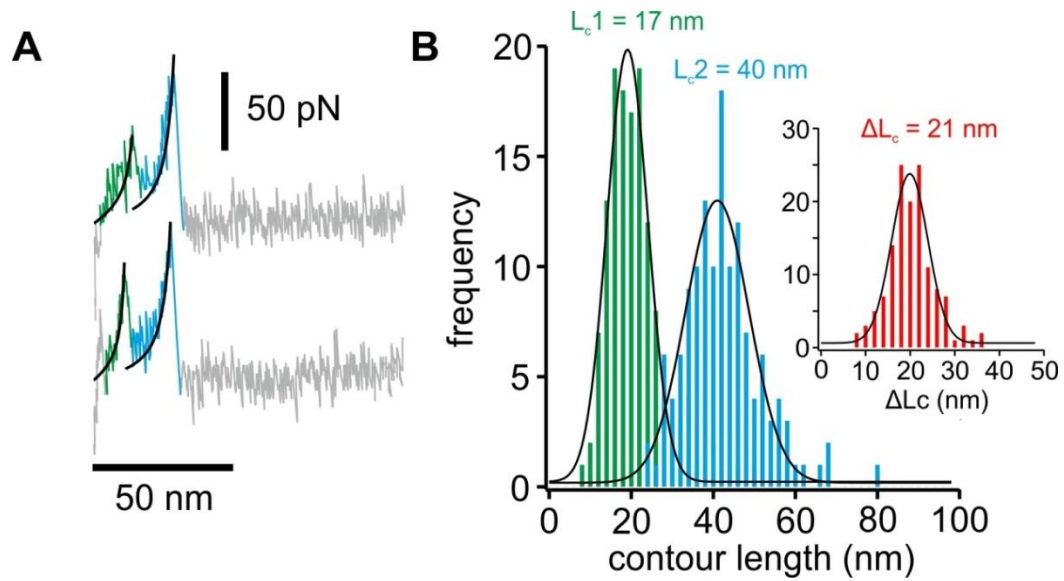

**Supplementary Fig. 3:** SMFS results of wild-type BtuB unfolding using TonB<sub>CTD</sub> construct at 1000 nm s<sup>-1</sup>. **A)** Example force-extension traces of TonB<sub>CTD</sub>:BtuB:vitamin B<sub>12</sub> with the worm-like chain model ( $p = 0.4$  nm) fit. **B)** Contour length distributions of unfolding (green) and unbinding (blue) and  $\Delta L_c$  (red inset).

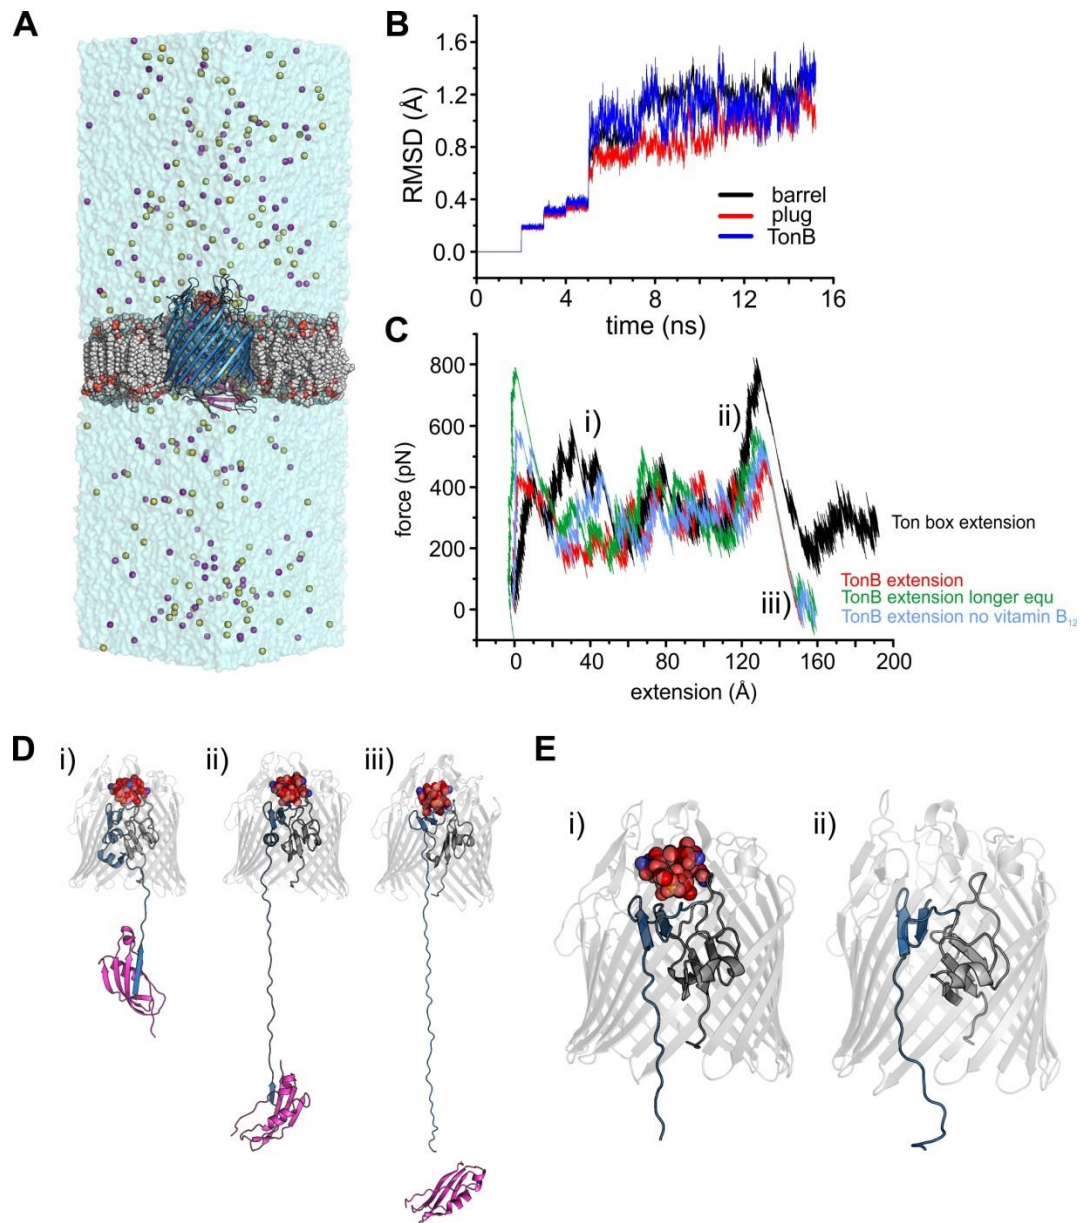

**Supplementary Fig. 4:** Steered molecular dynamics (SMD) of the TonB:BtuB:vitamin B<sub>12</sub> complex. **A**) The equilibrated system of BtuB (blue cartoon) in complex with TonB (pink cartoon) and vitamin B<sub>12</sub> (red space-fill) (PDB: 2GSK) in a POPC lipid bilayer (red and white spheres) and a large water box (blue surface representation). The Na<sup>+</sup> and Ca<sup>2+</sup> ions are shown as coloured spheres. **B**) Root mean square deviation (RMSD) of the individual components (labelled) during the equilibration of the system. **C**) SMD force-extension plot when extended via the Ton box (black), or from TonB (red). Extension via the Ton box caused sequential unfolding of the plug domain after 80 ns of simulation (corresponding to a 20 nm extension of the C-terminus from its original position) and formation of a channel through the receptor (Figure 5B). When extended from the centre of mass of TonB, it remained in complex with the Ton box and 46 residues (up to residue G51, ~13 nm of extension) of the plug domain was unfolded before the complex broke apart. To form a continuous channel, an additional 22 residues are required to be unfolded (up to residue S74). A longer equilibration (20 ns) of the system prior to extension (green force extension profile), however, did not change this observation. Finally to assess whether vitamin B<sub>12</sub> was stabilising residues 47-74 (which it is also in contact with) a system was set up without the vitamin B<sub>12</sub> in the BtuB binding pocket (blue force extension profile). Again, 46 residues were unfolded before TonB dissociated from the Ton box. **D**) SMD snap-shots of TonB (pink) unfolding the plug domain of BtuB (barrel domain shown as grey transparent cartoon, plug domain shown in blue and vitamin B<sub>12</sub> as spheres). The membrane and water are hidden for simplicity). In iii) 46 residues (~130 Å extension) have been unfolded by the non-covalent TonB:Ton box complex. The numbered snapshots are also shown in C). **E**) Close up of the BtuB plug domain i) with vitamin B<sub>12</sub> and ii) without) after 130 Å extension via SMD using TonB, BtuB plug residues 5-74 are shown in blue and the recalcitrant plug subdomain in grey.

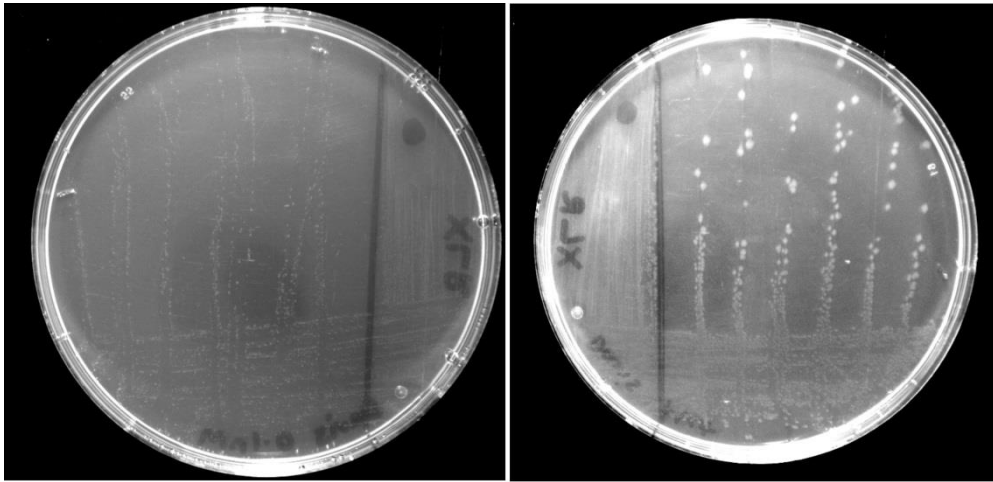

Davis 0.1 nM vitamin B<sub>12</sub>

Davis 5 µg/mL methionine

+

++

**Supplementary Fig. 5:** Examples of the methionine growth assay on Davis minimal agar with 0.1 nM vitamin B<sub>12</sub> after 48 hours incubation at 37 °C. **Left:** partial growth seen in a BtuB variant where partial plug domain unfolding is prevented. **Right:** the full growth phenotype (colony size 2 mm) is exemplified by the colonies observed after incubated for 48 hours at 37 °C on methionine supplemented Davis minimal agar (right).

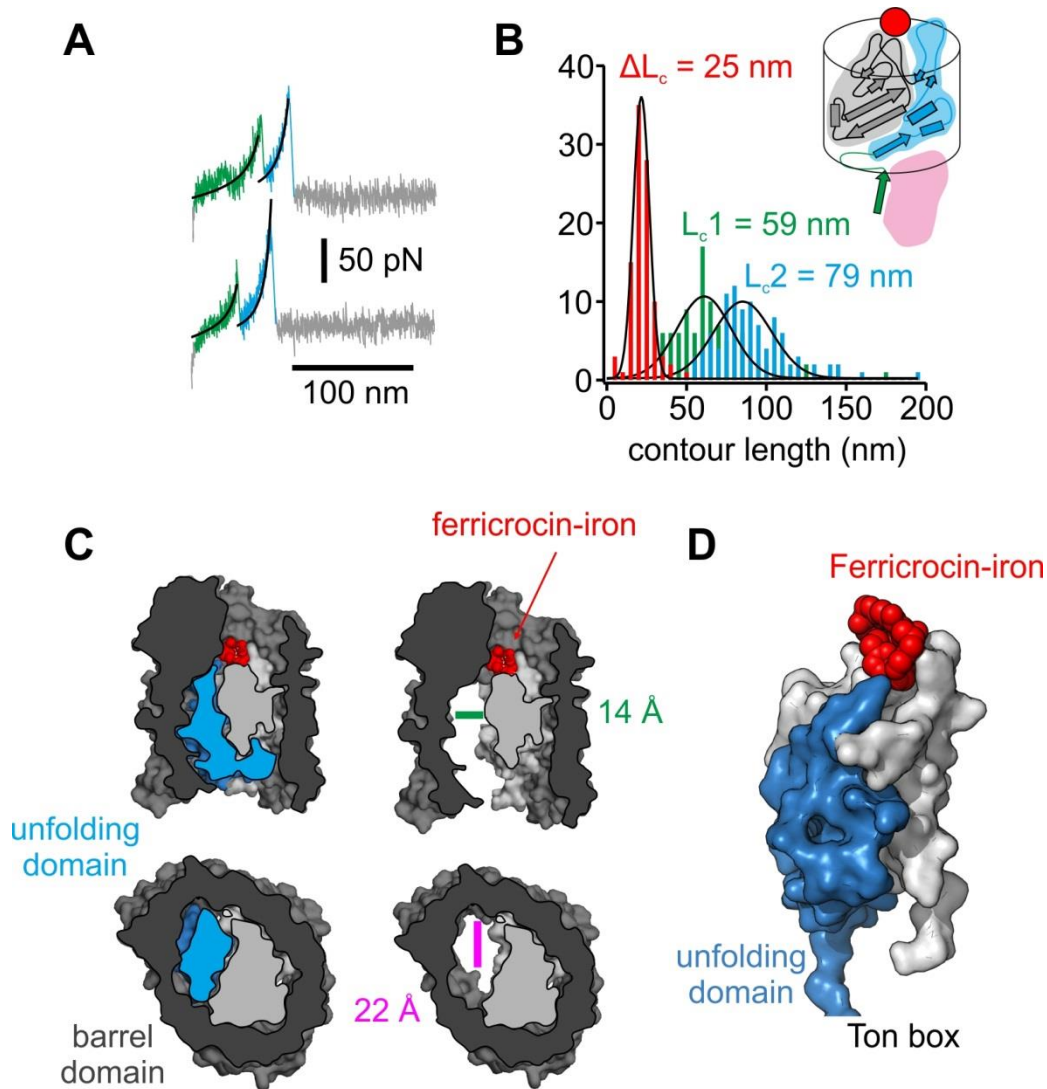

**Supplementary Fig. 6: SMFS of FhuA** **A)** Examples of the double rupture events with the WLC fit **B)**  $L_{c1}$  (green),  $L_{c2}$  (blue) and  $\Delta L_c$  (red) distributions of the double rupture peaks with Gaussian fits (data shown are from one replicate); the inset shows a secondary structure schematic of the FhuA plug domain with the residues unfolded (inferred from the  $\Delta L_c$  value) shown in blue, TonB in pink, the Ton box in green and the ferricrocin substrate in red. **C)** Surface representation vertical and horizontal cross-sections of FhuA (PDB: 2GRX) showing the effect of removing 62 amino acids (blue) downstream of the Ton box. The dimensions of the resultant channel are shown. **D)** Surface representation of the plug domain of FhuA, the residues that are unfolded (inferred from the  $\Delta L_c$  value) are coloured blue.



| BtuB wt                | # | N attempts | n events* | Hits (%) | Plug unfolding |          |            |         | TonB unbinding |          |            |         | $\Delta L_c$ (nm) | Average |
|------------------------|---|------------|-----------|----------|----------------|----------|------------|---------|----------------|----------|------------|---------|-------------------|---------|
|                        |   |            |           |          | Force (pN)     | Average  | $L_c$ (nm) | Average | Force (pN)     | Average  | $L_c$ (nm) | Average |                   |         |
| 200 nms <sup>-1</sup>  | 1 | 2400       | 33        | 1.4      | 62             | 51 ± 10  | 54         | 53 ± 4  | 68             | 66 ± 3   | 80         | 76 ± 7  | 21                | 19 ± 2  |
|                        | 2 | 4300       | 42        | 1.0      | 41             |          | 55         |         | 63             |          | 79         |         | 19                |         |
|                        | 3 | 2237       | 19        | 0.8      | 51             |          | 49         |         | 66             |          | 69         |         | 18                |         |
| 500 nms <sup>-1</sup>  | 1 | 1200       | 30        | 2.5      | 70             | 59 ± 10  | 51         | 53 ± 6  | 77             | 85 ± 8   | 80         | 76 ± 9  | 26                | 22 ± 4  |
|                        | 2 | 1050       | 27        | 2.6      | 57             |          | 48         |         | 90             |          | 67         |         | 20                |         |
|                        | 3 | 1167       | 24        | 2.0      | 49             |          | 59         |         | 87             |          | 81         |         | 20                |         |
| 1000 nms <sup>-1</sup> | 1 | 2400       | 54        | 2.2      | 63             | 61 ± 4   | 58         | 58 ± 3  | 105            | 91 ± 23  | 70         | 77 ± 7  | 20                | 20 ± 2  |
|                        | 2 | 1200       | 18        | 1.5      | 62             |          | 55         |         | 68             |          | 80         |         | 21                |         |
|                        | 3 | 1948       | 81        | 4.1      | 57             |          | 61         |         | 100            |          | 82         |         | 18                |         |
| 5000 nms <sup>-1</sup> | 1 | 1000       | 17        | 1.7      | 130            | 118 ± 20 | 41         | 45 ± 5  | 125            | 131 ± 21 | 75         | 71 ± 10 | 24                | 24 ± 2  |
|                        | 2 | 1200       | 11        | 0.9      | 98             |          | 43         |         | 115            |          | 61         |         | 25                |         |
|                        | 3 | 1200       | 44        | 3.7      | 125            |          | 50         |         | 152            |          | 76         |         | 22                |         |

**Supplementary Table 1: AFM data of TonB<sub>ATMD</sub>:wild-type BtuB unbinding at various retraction velocities.**

Force, contour length ( $L_c$ ) and  $\Delta L_c$  values were calculated by plotting the distribution of events and fitting with a Gaussian to obtain the mean value. The error on the average is the range of the triplicate averages. \*number of double events.

| Variant                  | # | N attempts | n events <sup>a</sup> | Hits (%) | Plug unfolding |        |            |         | TonB unbinding |         |            |        | $\Delta L_c$ (nm) | Av     |
|--------------------------|---|------------|-----------------------|----------|----------------|--------|------------|---------|----------------|---------|------------|--------|-------------------|--------|
|                          |   |            |                       |          | Force (pN)     | Av     | $L_c$ (nm) | Average | Force (pN)     | Average | $L_c$ (nm) | Av     |                   |        |
| BtuB:TonB <sub>CTD</sub> | 1 | 9815       | 69                    | 0.7      | 59             | 52 ± 7 | 17         | 19 ± 2  | 94             | 86 ± 8  | 40         | 41 ± 2 | 21                | 20 ± 2 |
|                          | 2 | 4617       | 42                    | 0.9      | 50             |        | 21         |         | 82             |         | 43         |        | 21                |        |
|                          | 3 | 8550       | 26                    | 0.3      | 48             |        | 20         |         | 82             |         | 40         |        | 18                |        |

**Supplementary Table 2: AFM data of TonB<sub>CTD</sub>:wild-type BtuB at 1000 nms<sup>-1</sup>.**

Force, contour length ( $L_c$ ) and  $\Delta L_c$  values were calculated by plotting the distribution of events and fitting with a Gaussian to obtain the mean value. The error on the average is the range of the triplicate averages.

| Variant                                    | # | N attempts | n events <sup>a</sup> | Hits (%)         | Plug unfolding |        |            |         | TonB unbinding |         |            |        | $\Delta L_c$ (nm) | Av     |
|--------------------------------------------|---|------------|-----------------------|------------------|----------------|--------|------------|---------|----------------|---------|------------|--------|-------------------|--------|
|                                            |   |            |                       |                  | Force (pN)     | Av     | $L_c$ (nm) | Average | Force (pN)     | Average | $L_c$ (nm) | Av     |                   |        |
| BtuB wt                                    | 1 | 2400       | 54                    | 2.2              | 63             | 60 ± 3 | 58         | 57 ± 4  | 105            | 91 ± 23 | 70         | 77 ± 7 | 20                | 20 ± 2 |
|                                            | 2 | 1200       | 18                    | 1.5              | 62             |        | 54         |         | 68             |         | 80         |        | 21                |        |
|                                            | 3 | 1948       | 81                    | 4.1              | 57             |        | 61         |         | 100            |         | 82         |        | 18                |        |
| XL <sub>barrel</sub> (L23C/S374C) No DTT   | 1 | 6725       | 85 <sup>b</sup>       | 1.3 <sup>b</sup> | -              | -      | -          | -       | 102            | 100 ± 6 | 48         | 47 ± 2 | -                 | -      |
|                                            | 2 | 2492       | 38 <sup>b</sup>       | 1.5 <sup>b</sup> | -              |        | -          |         | 104            |         | 45         |        | -                 |        |
|                                            | 3 | 3304       | 73 <sup>b</sup>       | 2.2 <sup>b</sup> | -              |        | -          |         | 94             |         | 47         |        | -                 |        |
| XL <sub>barrel</sub> (L23C/S374C) 2 mM DTT | 1 | 3419       | 18                    | 0.5              | 63             | 64 ± 1 | 52         | 51 ± 5  | 92             | 99 ± 7  | 82         | 76 ± 7 | 25                | 21 ± 4 |
|                                            | 2 | 3669       | 69                    | 1.9              | 65             |        | 46         |         | 105            |         | 69         |        | 21                |        |
|                                            | 3 | 3753       | 22                    | 0.6              | 64             |        | 55         |         | 100            |         | 77         |        | 19                |        |
| XL <sub>loop</sub> (V29C/V45) No DTT       | 1 | 6386       | 88                    | 1.4              | 56             | 55 ± 4 | 58         | 53 ± 7  | 103            | 98 ± 8  | 76         | 69 ± 8 | 17                | 14 ± 3 |
|                                            | 2 | 7365       | 44                    | 0.6              | 51             |        | 55         |         | 90             |         | 71         |        | 11                |        |
|                                            | 3 | 2000       | 22                    | 1.1              | 58             |        | 46         |         | 101            |         | 61         |        | 15                |        |
| XL <sub>loop</sub> (V29C/V45) 2 mM DTT     | 1 | 8324       | 34                    | 0.4              | 60             | 61 ± 4 | 49         | 49 ± 3  | 99             | 102 ± 3 | 70         | 69 ± 4 | 21                | 20 ± 1 |
|                                            | 2 | 6420       | 71                    | 1.1              | 65             |        | 52         |         | 102            |         | 72         |        | 19                |        |
|                                            | 3 | 3579       | 17                    | 0.5              | 57             |        | 47         |         | 105            |         | 65         |        | 19                |        |

**Supplementary Table 3: data of TonB<sub>ATMD</sub>:BtuB variants (± 2 mM DTT) at 1000 nms<sup>-1</sup>.**

Force, contour length ( $L_c$ ) and  $\Delta L_c$  values were calculated by plotting the distribution of events and fitting with a Gaussian to obtain the mean value. The error on the average is the range of the triplicate averages. <sup>a</sup>number of double events, <sup>b</sup>number/% of single events.

| Protein | # | N attempts | n events <sup>a</sup> | Hits (%) | Plug unfolding |         |            |         | TonB unbinding |          |            |        | $\Delta L_c$ (nm) | Av     |
|---------|---|------------|-----------------------|----------|----------------|---------|------------|---------|----------------|----------|------------|--------|-------------------|--------|
|         |   |            |                       |          | Force (pN)     | Av      | $L_c$ (nm) | Average | Force (pN)     | Average  | $L_c$ (nm) | Av     |                   |        |
| FhuA    | 1 | 5207       | 34                    | 0.7      | 89             | 74 ± 11 | 66         | 62 ± 4  | 124            | 105 ± 24 | 94         | 85 ± 9 | 26                | 25 ± 1 |
|         | 2 | 6139       | 41                    | 0.7      | 70             |         | 62         |         | 100            |          | 82         |        | 24                |        |
|         | 3 | 8150       | 24                    | 0.3      | 63             |         | 59         |         | 91             |          | 79         |        | 24                |        |

**Supplementary Table 4: AFM data of TonB<sub>ATMD</sub>:FhuA at 1000 nms<sup>-1</sup>.**

Force, contour length ( $L_c$ ) and  $\Delta L_c$  values were calculated by plotting the distribution of events and fitting with a Gaussian to obtain the mean value. The error on the average is the range of the triplicate averages.



| protein                | #  | Peak 1     |            | Peak 2     |            | Peak 3 (TonB unbinding) |            | $\Delta L_c$ 1 (nm) | $\Delta L_c$ 2 (nm) |
|------------------------|----|------------|------------|------------|------------|-------------------------|------------|---------------------|---------------------|
|                        |    | Force (pN) | $L_c$ (nm) | Force (pN) | $L_c$ (nm) | Force (pN)              | $L_c$ (nm) |                     |                     |
| BtuB<br>180A/L85A/L96A | 1  | 68         | 50         | 85         | 75         | 117                     | 98         | 23                  | 28                  |
|                        | 2  | 62         | 51         | 96         | 72         | 120                     | 94         | 17                  | 23                  |
|                        | 3  | 62         | 49         | 99         | 62         | 125                     | 90         | 18                  | 27                  |
|                        | av | $64 \pm 4$ | $50 \pm 1$ | $94 \pm 9$ | $70 \pm 5$ | $121 \pm 4$             | $94 \pm 4$ | $19 \pm 4$          | $26 \pm 3$          |

**Supplementary Table 5: AFM data of TonB<sub>ATMD</sub>:BtuB<sub>3A</sub> at 1000 nms<sup>-1</sup>.**

Force, contour length ( $L_c$ ) and  $\Delta L_c$  values were calculated by plotting the distribution of events and fitting with a Gaussian to obtain the mean value. The error on the average is the range of the triplicate averages.

| Variant           | Forward primer                  | Reverse primer                 |
|-------------------|---------------------------------|--------------------------------|
| BtuB<br>L8P       | CCCGGATACTCCCGTCGTTACTG         | CTGGTATCCTGTGCCCAA             |
| BtuB<br>L23C      | CAGCACTGTGTGTGCACCAACCACC       | CGCGGCTGTCAAACCGG              |
| BtuB<br>S374C     | CTGGCAAACCTGCGCCGGTTG           | GTTCCATGACGACCAAACACTGTG       |
| BtuB<br>V29C      | AACCACCGTTTGCACCCGTCAGGATATCGAC | GGTGCAAGCACAGTGCTG             |
| BtuB<br>V45C      | GGTCAATGATTGCCTGCGCCGCTTCCGGG   | GAGGTCGACTGCCAGCGG             |
| BtuB<br>180A/L85A | GTACGCGCGAATCTGGCGGGGGTGAGT     | GCCATCAGCTAACACCAACACATGACTGGC |
| BtuB<br>L96A      | TTCTGCCGACGCTAGCCAGTTCCTATTGCG  | CCACTACCCCCGCCAGA              |

**Supplementary Table 6: Primers for generating BtuB variants using Q5® Site-Directed Mutagenesis kit (NEB)**
